# Supplementary material for: Temporal drivers of abundance and community structure of scyphozoan jellyfish in tropical coastal waters
Source: PeerJ. 2025 Jan 16;13:e18483. doi: 10.7717/peerj.18483 (PMC11742249; doi:10.7717/peerj.18483)
Supplement: Supplemental Information 3 — CPUE, No. of individuals/net; Dry, dry period; Wet, wet period; 1Q, 1st quarter moon; 3Q, 3rd quarter moon; FM, full moon; NM, new moon; D, day; N, night; F, flood tide; E, ebb tide. [file peerj-13-18483-s003.xlsx]

## Sheet: MONTHLY JELLYFISH
Temporal Variables			Scyphozoan Abundance (CPUE: No. of individuals/net)
Monsoon	Month	Replicate	Cyanea sp.	Phyllorhiza punctata	Lobonemoides robustus	Rhopilema esculentum	Rhopilema hispidum	Chrysaora chinensis	Lychnorhiza malayensis	Acromitus flagellatus	All Species
SW	2010-06-01	1	2	2	0	0	0	0	0	0	4
SW	2010-06-01	2	0	1	0	0	0	0	0	0	1
SW	2010-06-01	3	4	1	0	1	0	0	0	0	6
SW	2010-06-01	4	0	0	0	0	0	0	0	0	0
SW	2010-06-01	5	2	0	0	0	0	0	0	0	2
SW	2010-06-01	6	0	0	0	0	0	0	0	0	0
SW	2010-06-01	7	3	2	0	0	0	0	0	0	5
SW	2010-06-01	8	2	0	0	0	0	0	0	0	2
SW	2010-06-01	9	4	1	0	0	0	1	0	0	6
SW	2010-06-01	10	5	2	0	1	0	0	0	0	8
SW	2010-06-01	11	2	1	0	0	0	0	0	0	3
SW	2010-06-01	12	2	0	0	0	0	0	0	0	2
SW	2010-06-01	13	1	3	0	0	0	0	0	0	4
SW	2010-07-01	1	0	0	10	0	1	0	0	0	11
SW	2010-07-01	2	1	0	12	0	1	0	0	0	14
SW	2010-07-01	3	3	0	13	0	2	0	0	0	18
SW	2010-07-01	4	0	0	11	0	1	0	0	0	12
SW	2010-07-01	5	1	0	13	0	0	0	0	0	14
SW	2010-07-01	6	1	0	12	0	0	0	0	0	13
SW	2010-08-01	1	2	0	7	0	0	0	0	0	9
SW	2010-08-01	2	1	0	8	0	0	0	0	0	9
SW	2010-08-01	3	0	0	12	0	0	0	0	0	12
SW	2010-08-01	4	4	0	9	0	0	0	0	0	13
SW	2010-08-01	5	2	1	12	0	0	0	0	0	15
SW	2010-08-01	6	2	0	9	0	0	0	0	0	11
SW	2010-08-01	7	2	1	9	0	0	0	0	0	12
SW	2010-08-01	8	6	1	9	0	0	0	0	0	16
SW	2010-08-01	9	3	0	9	0	0	0	0	0	12
SW	2010-08-01	10	2	1	9	0	0	0	0	0	12
SW	2010-08-01	11	5	0	9	0	0	0	0	0	14
SW	2010-08-01	12	2	0	9	0	0	0	0	0	11
SW	2010-08-01	13	0	0	9	0	1	0	0	0	10
SW	2010-08-01	14	0	0	9	0	0	0	0	0	9
SW	2010-09-01	1	1	2	8	0	0	0	0	0	11
SW	2010-09-01	2	0	4	8	0	1	0	0	0	13
SW	2010-09-01	3	0	0	8	0	0	0	0	0	8
SW	2010-09-01	4	0	2	8	0	0	0	0	0	10
SW	2010-09-01	5	4	1	9	0	1	0	0	0	15
SW	2010-09-01	6	1	5	8	0	1	0	0	0	15
SW	2010-09-01	7	1	2	9	0	1	0	0	0	13
SW	2010-09-01	8	1	4	8	0	0	0	0	0	13
SW	2010-09-01	9	0	1	8	0	1	0	0	0	10
SW	2010-09-01	10	0	3	8	0	2	0	0	0	13
IN	2010-10-01	1	2	0	2	1	0	0	0	0	5
IN	2010-10-01	2	0	2	1	2	0	0	0	0	5
IN	2010-10-01	3	0	4	2	1	1	0	1	1	10
IN	2010-10-01	4	1	7	1	0	0	0	0	0	9
IN	2010-10-01	5	0	2	3	0	1	0	0	1	7
IN	2010-10-01	6	0	2	3	0	0	0	1	0	6
IN	2010-10-01	7	0	1	1	0	1	0	0	0	3
IN	2010-10-01	8	0	3	0	0	0	0	0	0	3
NE	2010-11-01	1	0	11	0	1	0	0	0	1	13
NE	2010-11-01	2	1	10	0	0	1	0	0	1	13
NE	2010-11-01	3	0	10	2	0	0	0	0	0	12
NE	2010-11-01	4	0	9	1	0	0	0	0	0	10
NE	2010-11-01	5	0	10	1	0	1	0	0	0	12
NE	2010-11-01	6	1	9	0	0	0	0	0	0	10
NE	2010-11-01	7	0	10	2	1	0	0	1	0	14
NE	2010-11-01	8	0	9	1	2	0	0	0	0	12
NE	2010-11-01	9	0	10	3	1	0	0	0	0	14
NE	2010-11-01	10	1	9	1	0	0	1	0	0	12
NE	2010-11-01	11	1	9	0	1	0	0	0	0	11
NE	2010-11-01	12	1	9	0	1	0	0	0	0	11
NE	2010-11-01	13	1	9	1	1	0	1	0	0	13
NE	2010-11-01	14	0	9	0	0	0	0	0	0	9
NE	2010-11-01	15	2	9	1	0	0	0	0	0	12
NE	2010-11-01	16	1	9	1	0	0	0	0	0	11
NE	2010-11-01	17	0	9	0	1	0	0	0	0	10
NE	2010-11-01	18	0	9	0	1	0	0	0	0	10
NE	2010-11-01	19	0	9	0	1	0	0	0	0	10
NE	2010-11-01	20	0	10	1	0	0	0	0	0	11
NE	2010-12-01	1	1	4	0	0	0	0	0	0	5
NE	2010-12-01	2	1	5	1	0	0	0	0	0	7
NE	2010-12-01	3	2	1	0	0	0	0	0	0	3
NE	2010-12-01	4	1	2	0	0	0	0	0	0	3
NE	2010-12-01	5	1	3	0	0	0	0	0	0	4
NE	2010-12-01	6	3	8	0	0	0	0	0	0	11
NE	2010-12-01	7	3	7	0	0	0	1	0	0	11
NE	2010-12-01	8	0	5	0	1	0	0	0	0	6
NE	2010-12-01	9	1	9	0	0	0	0	0	0	10
NE	2010-12-01	10	2	5	0	0	0	0	0	0	7
NE	2010-12-01	11	2	4	0	0	0	0	0	0	6
NE	2010-12-01	12	2	6	1	0	0	0	0	0	9
NE	2010-12-01	13	2	6	0	0	0	0	0	0	8
NE	2010-12-01	14	1	5	0	0	1	0	0	0	7
NE	2010-12-01	15	2	5	0	1	0	0	0	0	8
NE	2010-12-01	16	2	8	0	0	0	0	0	0	10
NE	2010-12-01	17	2	8	0	1	0	0	0	0	11
NE	2010-12-01	18	1	7	0	0	0	0	0	1	9
NE	2010-12-01	19	5	3	0	0	0	0	0	0	8
NE	2010-12-01	20	4	6	0	0	0	0	0	2	12
NE	2011-01-01	1	0	18	0	0	0	0	0	0	18
NE	2011-01-01	2	1	20	0	0	0	0	0	0	21
NE	2011-01-01	3	0	25	0	1	1	0	0	0	27
NE	2011-01-01	4	0	20	1	0	0	0	0	0	21
NE	2011-01-01	5	0	20	0	1	0	0	0	0	21
NE	2011-01-01	6	1	20	2	0	0	0	0	0	23
NE	2011-01-01	7	1	20	0	0	0	0	0	0	21
NE	2011-01-01	8	0	20	0	0	0	0	0	0	20
NE	2011-01-01	9	0	20	1	0	0	0	0	0	21
NE	2011-01-01	10	0	20	0	0	0	0	0	0	20
NE	2011-02-01	1	4	2	0	0	0	0	0	0	6
NE	2011-02-01	2	10	9	0	1	0	0	0	0	20
NE	2011-02-01	3	8	7	0	0	0	1	0	0	16
NE	2011-02-01	4	10	8	0	0	0	0	0	0	18
NE	2011-02-01	5	12	8	0	0	0	0	0	0	20
NE	2011-02-01	6	10	8	0	0	0	3	0	0	21
NE	2011-02-01	7	10	12	0	0	0	3	0	0	25
NE	2011-02-01	8	10	10	0	3	0	1	0	0	24
NE	2011-02-01	9	10	14	0	0	0	1	0	0	25
NE	2011-02-01	10	10	12	0	1	0	0	0	0	23
NE	2011-02-01	11	12	10	0	2	0	1	0	1	26
NE	2011-02-01	12	9	12	0	1	0	0	0	0	22
NE	2011-02-01	13	10	10	0	0	0	0	0	0	20
NE	2011-02-01	14	10	12	0	1	0	1	0	0	24
NE	2011-02-01	15	10	10	0	1	0	0	0	0	21
NE	2011-02-01	16	12	12	0	0	0	1	0	0	25
NE	2011-02-01	17	10	10	0	0	0	0	0	0	20
NE	2011-02-01	18	10	10	0	1	0	0	0	0	21
NE	2011-03-01	1	5	0	0	0	0	0	0	0	5
NE	2011-03-01	2	6	1	0	0	0	0	0	0	7
NE	2011-03-01	3	8	0	0	0	1	0	0	0	9
NE	2011-03-01	4	7	1	0	0	1	0	0	0	9
NE	2011-03-01	5	9	1	0	0	0	0	0	0	10
NE	2011-03-01	6	8	0	0	0	0	0	0	0	8
IN	2011-04-01	1	1	1	0	0	0	0	0	0	2
IN	2011-04-01	2	2	4	0	0	0	0	0	0	6
IN	2011-04-01	3	2	0	0	0	0	0	0	0	2
IN	2011-04-01	4	2	4	0	0	0	1	0	0	7
IN	2011-04-01	5	3	1	0	1	0	0	0	0	5
IN	2011-04-01	6	5	1	0	0	0	0	0	0	6
IN	2011-04-01	7	0	0	0	0	0	0	0	0	0
IN	2011-04-01	8	3	0	0	3	0	0	0	0	6
IN	2011-04-01	9	5	2	0	0	0	0	0	0	7
IN	2011-04-01	10	5	2	0	0	0	2	0	1	10
IN	2011-04-01	11	7	2	0	0	0	0	0	0	9
IN	2011-04-01	12	9	1	0	0	1	1	0	0	12
IN	2011-04-01	13	7	4	0	0	0	0	0	0	11
IN	2011-04-01	14	8	2	0	0	0	0	0	0	10
IN	2011-04-01	15	8	0	0	0	0	0	0	0	8
IN	2011-04-01	16	1	1	0	2	0	0	0	0	4
IN	2011-04-01	17	0	0	0	0	0	0	0	0	0
SW	2011-05-01	1	2	1	1	0	0	0	0	0	4
SW	2011-05-01	2	3	3	0	0	0	0	0	0	6
SW	2011-05-01	3	0	1	0	0	0	0	0	0	1
SW	2011-05-01	4	4	3	0	0	0	0	0	0	7
SW	2011-05-01	5	3	4	0	0	0	1	0	0	8
SW	2011-05-01	6	3	1	0	1	0	1	1	0	7
SW	2011-05-01	7	4	1	0	0	0	0	1	0	6
SW	2011-05-01	8	4	2	0	0	0	0	0	0	6
SW	2011-05-01	9	3	1	0	0	0	0	0	0	4
SW	2011-05-01	10	4	0	0	0	0	0	1	0	5
SW	2011-05-01	11	4	1	0	0	0	0	0	0	5
SW	2011-05-01	12	5	3	0	0	0	0	0	0	8
SW	2011-05-01	13	0	1	0	0	0	0	0	0	1
SW	2011-05-01	14	6	3	0	0	0	0	0	0	9
SW	2011-05-01	15	7	4	0	0	0	0	0	0	11
SW	2011-05-01	16	4	1	0	0	0	0	0	0	5
SW	2011-05-01	17	6	1	0	0	0	0	0	0	7
SW	2011-05-01	18	5	2	0	0	0	0	0	0	7
SW	2011-05-01	19	3	1	0	0	0	0	0	0	4
SW	2011-05-01	20	4	0	0	0	0	0	0	0	4
SW	2011-06-01	1	2	5	1	0	0	0	0	0	8
SW	2011-06-01	2	1	3	2	0	0	0	0	0	6
SW	2011-06-01	3	1	6	1	0	0	0	0	0	8
SW	2011-06-01	4	2	4	1	0	0	2	0	0	9
SW	2011-06-01	5	1	8	1	0	0	0	0	0	10
SW	2011-06-01	6	1	3	0	0	0	0	0	0	4
SW	2011-06-01	7	3	8	0	0	0	0	0	0	11
SW	2011-06-01	8	3	7	2	0	1	0	0	0	13
SW	2011-06-01	9	3	9	1	0	0	0	0	0	13
SW	2011-06-01	10	3	14	1	0	0	1	0	0	19
SW	2011-06-01	11	3	4	2	0	0	0	0	0	9
SW	2011-06-01	12	4	4	0	0	0	0	0	0	8
SW	2011-06-01	13	1	12	1	0	0	0	0	0	14
SW	2011-06-01	14	2	3	1	0	0	0	0	0	6
SW	2011-07-01	1	0	1	3	0	0	0	0	0	4
SW	2011-07-01	2	3	0	1	0	0	0	0	0	4
SW	2011-07-01	3	5	0	2	0	0	0	0	0	7
SW	2011-07-01	4	3	0	1	0	1	0	0	0	5
SW	2011-07-01	5	4	0	1	0	0	0	0	0	5
SW	2011-07-01	6	2	0	1	0	0	0	0	0	3
SW	2011-07-01	7	5	0	0	0	0	0	0	0	5
SW	2011-07-01	8	4	0	2	0	0	0	0	0	6
SW	2011-07-01	9	2	1	2	0	0	0	0	0	5
SW	2011-07-01	10	0	1	1	0	0	1	0	0	3
SW	2011-07-01	11	7	1	1	0	0	0	0	0	9
SW	2011-07-01	12	0	0	2	0	0	1	0	0	3
SW	2011-07-01	13	5	0	0	0	0	0	0	0	5
SW	2011-07-01	14	12	2	1	0	0	0	0	0	15
SW	2011-07-01	15	4	0	1	0	0	0	0	0	5
SW	2011-07-01	16	7	0	1	0	0	0	0	0	8
SW	2011-07-01	17	5	1	1	0	0	0	0	0	7
SW	2011-07-01	18	4	0	0	0	0	0	0	0	4
SW	2011-07-01	19	10	1	3	0	0	0	0	0	14
SW	2011-07-01	20	6	1	0	0	0	0	0	0	7
SW	2011-08-01	1	8	0	0	0	0	0	0	0	8
SW	2011-08-01	2	8	0	1	0	0	0	0	0	9
SW	2011-08-01	3	5	0	2	0	0	0	0	0	7
SW	2011-08-01	4	5	0	2	1	0	0	0	0	8
SW	2011-08-01	5	11	0	1	0	0	0	0	0	12
SW	2011-08-01	6	3	0	3	0	0	1	0	0	7
SW	2011-08-01	7	4	0	2	0	0	0	0	0	6
SW	2011-08-01	8	2	0	2	0	0	0	0	0	4
SW	2011-09-01	1	2	0	1	0	0	0	0	0	3
SW	2011-09-01	2	1	0	1	0	0	0	0	0	2
SW	2011-09-01	3	1	0	1	0	0	0	0	0	2
SW	2011-09-01	4	2	0	0	0	0	0	0	0	2
SW	2011-09-01	5	3	1	1	1	0	0	0	0	6
SW	2011-09-01	6	1	0	2	0	0	0	0	0	3
SW	2011-09-01	7	4	0	0	0	0	0	0	0	4
SW	2011-09-01	8	2	0	1	0	0	0	0	0	3
SW	2011-09-01	9	1	0	0	2	0	0	0	0	3
SW	2011-09-01	10	4	0	0	0	0	0	0	0	4
SW	2011-09-01	11	3	0	1	0	0	0	0	0	4
SW	2011-09-01	12	0	1	1	0	0	0	0	0	2
SW	2011-09-01	13	4	0	2	0	0	0	0	0	6
SW	2011-09-01	14	1	0	2	1	0	0	0	0	4
SW	2011-09-01	15	2	0	3	0	0	0	0	1	6
SW	2011-09-01	16	2	0	7	0	0	0	0	0	9
SW	2011-09-01	17	2	0	1	0	0	0	0	0	3
SW	2011-09-01	18	2	0	1	1	0	0	0	0	4
SW	2011-09-01	19	7	0	0	0	0	0	0	0	7
IN	2011-10-01	1	0	0	2	3	0	0	0	0	5
IN	2011-10-01	2	1	4	0	0	0	0	0	0	5
IN	2011-10-01	3	1	2	0	2	0	0	1	0	6
IN	2011-10-01	4	1	0	1	2	0	0	0	0	4
IN	2011-10-01	5	0	6	3	4	0	0	1	0	14
IN	2011-10-01	6	0	1	1	4	0	0	0	0	6
IN	2011-10-01	7	1	1	1	6	0	0	0	0	9
IN	2011-10-01	8	1	1	6	2	0	0	3	0	13
IN	2011-10-01	9	1	0	1	5	0	0	3	0	10
IN	2011-10-01	10	1	0	0	6	0	0	0	0	7
IN	2011-10-01	11	0	0	2	2	0	0	4	0	8
IN	2011-10-01	12	0	0	2	0	0	0	1	0	3
IN	2011-10-01	13	0	2	1	2	0	0	1	0	6
IN	2011-10-01	14	0	0	1	4	0	0	2	0	7
IN	2011-10-01	15	0	1	1	3	0	0	0	0	5
NE	2011-11-01	1	0	5	0	0	1	0	0	0	6
NE	2011-11-01	2	4	7	0	0	0	0	0	0	11
NE	2011-11-01	3	0	3	0	0	0	0	0	0	3
NE	2011-11-01	4	1	11	0	3	0	0	1	1	17
NE	2011-11-01	5	5	24	1	0	0	0	0	0	30
NE	2011-11-01	6	2	10	0	0	0	0	0	0	12
NE	2011-11-01	7	1	19	0	1	0	0	1	0	22
NE	2011-11-01	8	5	9	1	0	0	0	0	0	15
NE	2011-11-01	9	3	9	0	1	0	0	0	0	13
NE	2011-11-01	10	4	15	0	0	0	0	0	0	19
NE	2011-11-01	11	10	11	0	0	0	1	0	0	22
NE	2011-11-01	12	2	18	0	0	0	0	0	0	20
NE	2011-11-01	13	11	9	0	0	0	0	0	0	20
NE	2011-11-01	14	1	24	0	2	0	0	0	0	27
NE	2011-12-01	1	0	2	0	0	0	0	0	0	2
NE	2011-12-01	2	0	1	0	0	0	0	0	0	1
NE	2011-12-01	3	0	1	0	0	0	0	0	0	1
NE	2011-12-01	4	1	2	0	0	0	0	0	0	3
NE	2011-12-01	5	0	0	0	1	0	0	0	0	1
NE	2011-12-01	6	3	1	0	0	1	0	0	0	5
NE	2011-12-01	7	0	2	0	0	0	0	0	0	2
NE	2011-12-01	8	0	2	0	1	0	0	0	0	3
NE	2011-12-01	9	2	5	1	0	0	0	0	1	9
NE	2011-12-01	10	8	1	0	1	0	0	0	0	10
NE	2011-12-01	11	3	1	0	1	0	0	0	0	5
NE	2011-12-01	12	5	1	0	0	0	0	0	0	6
NE	2011-12-01	13	1	1	0	2	0	0	0	0	4
NE	2011-12-01	14	2	1	0	2	0	0	0	0	5
NE	2011-12-01	15	6	1	0	0	1	2	0	0	10
NE	2011-12-01	16	1	1	1	3	0	0	0	0	6
NE	2011-12-01	17	1	1	0	2	0	0	0	0	4
NE	2011-12-01	18	3	2	0	3	0	0	0	0	8
NE	2011-12-01	19	4	1	0	1	0	0	0	0	6
NE	2011-12-01	20	2	1	0	1	0	0	0	0	4

## Sheet: MONTHLY PARAMETERS
Temporal Variables			Water Parameters
Monsoon	Month	Replicate	Temperature (°C)	DO (mg/L)	Salinity (ppt)	pH
SW	2010-06-01	1	29.86	6.3	31.19	7.92
SW	2010-06-01	2	29.89	6.32	31	8.02
SW	2010-06-01	3	29.74	5.83	31.09	7.83
SW	2010-07-01	1	29.62	6.04	31.7	8.1
SW	2010-07-01	2	29.68	6.06	31.6	8.17
SW	2010-07-01	3	29.58	6.25	31.4	7.97
SW	2010-08-01	1	29.63	6.05	32.02	8.05
SW	2010-08-01	2	29.54	5.72	32	8.14
SW	2010-08-01	3	29.74	5.9	31.5	7.97
SW	2010-09-01	1	30.5	4.9	31.28	8.01
SW	2010-09-01	2	30.6	5.1	31.48	8.09
SW	2010-09-01	3	30.53	5.69	31.28	7.92
IN	2010-10-01	1	29.5	4.88	31.75	7.74
IN	2010-10-01	2	29.69	5.4	31	7.97
IN	2010-10-01	3	29.42	5.3	31.45	7.51
NE	2010-11-01	1	30.31	5.11	29.09	7.63
NE	2010-11-01	2	30.25	5.42	29.6	7.47
NE	2010-11-01	3	30.2	5.43	30.04	7.77
NE	2010-12-01	1	29.08	5.94	29.8	7.8
NE	2010-12-01	2	29.23	5.3	30.3	7.64
NE	2010-12-01	3	28.87	5.7	29.8	7.97
NE	2011-01-01	1	29.5	5.06	30	7.89
NE	2011-01-01	2	29.52	5.46	30.05	7.74
NE	2011-01-01	3	29.32	5.2	30.3	8.04
NE	2011-02-01	1	30.3	5.67	30.1	8.03
NE	2011-02-01	2	30.25	5.4	30.2	7.93
NE	2011-02-01	3	30.04	5.04	29.9	8.12
NE	2011-03-01	1	29.14	5.54	30.5	7.98
NE	2011-03-01	2	29.3	5.7	30.1	7.91
NE	2011-03-01	3	29.1	5.22	30.3	8.08
IN	2011-04-01	1	30.22	5.68	31.11	8.06
IN	2011-04-01	2	30.25	6.2	30.44	8
IN	2011-04-01	3	30.24	6.02	30.54	8.13
SW	2011-05-01	1	30.28	4.73	31.38	7.95
SW	2011-05-01	2	30.25	4.9	31.1	7.82
SW	2011-05-01	3	30.33	4.27	31.2	8.12
SW	2011-06-01	1	30.19	6.6	32.53	7.93
SW	2011-06-01	2	30.25	6.3	31.7	7.84
SW	2011-06-01	3	29.7	6.1	31.65	8.04
SW	2011-07-01	1	29.21	6.3	31.09	8.13
SW	2011-07-01	2	29.6	6.2	31.12	8.17
SW	2011-07-01	3	29.26	6.03	30.78	8.08
SW	2011-08-01	1	29.86	5.4	32.05	8.07
SW	2011-08-01	2	29.71	5.76	31.6	8.02
SW	2011-08-01	3	29.91	5.13	31.7	8.1
SW	2011-09-01	1	29.9	5.43	32.1	7.91
SW	2011-09-01	2	29.71	4.6	31.55	7.81
SW	2011-09-01	3	30.1	4.58	31.46	8.02
IN	2011-10-01	1	29.77	5.68	31	7.73
IN	2011-10-01	2	30.07	6.1	30.28	7.54
IN	2011-10-01	3	29.47	5.9	30.51	7.91
NE	2011-11-01	1	30.2	5.77	28.64	7.87
NE	2011-11-01	2	30.14	5.76	29.2	7.95
NE	2011-11-01	3	30.28	5.2	29.3	7.79
NE	2011-12-01	1	28.91	5.53	28.9	7.75
NE	2011-12-01	2	29.25	5.4	29.05	7.59
NE	2011-12-01	3	29.31	5.2	29.4	7.9

## Sheet: 24 HOUR JELLYFISH
Temporal Variables						Scyphozoan Abundance (CPUE: No. of individuals/net)
Period	Moon-Tide	Moon Phase	Diel	Tide	Replicate	Cyanea sp.	Phyllorhiza punctata	Lobonemoides robustus	Rhopilema esculentum	Rhopilema hispidum	Chrysaora chinensis	Acromitus flagellatus	Lychnorhiza malayensis	All Species
Dry	Neap	1Q	D	F	1	2	1	0	0	0	0	0	0	3
Dry	Neap	1Q	D	F	2	0	1	0	0	0	0	0	0	1
Dry	Neap	1Q	D	F	3	1	0	0	0	0	0	0	0	1
Dry	Neap	1Q	D	F	4	1	1	0	0	0	0	0	0	2
Dry	Neap	1Q	D	F	5	1	0	0	0	0	0	0	0	1
Dry	Neap	1Q	D	F	6	0	1	0	0	0	1	0	0	2
Dry	Neap	1Q	D	F	7	1	2	0	0	0	0	0	0	3
Dry	Neap	1Q	D	F	8	1	1	1	0	0	0	0	0	3
Dry	Neap	1Q	D	F	9	0	0	0	0	0	1	0	0	1
Dry	Neap	1Q	D	E	1	4	1	0	0	0	0	0	0	5
Dry	Neap	1Q	D	E	2	1	0	0	0	0	0	0	0	1
Dry	Neap	1Q	D	E	3	1	1	1	0	0	2	0	0	5
Dry	Neap	1Q	D	E	4	2	1	0	0	0	0	0	0	3
Dry	Neap	1Q	D	E	5	0	0	0	0	0	0	0	0	0
Dry	Neap	1Q	D	E	6	1	0	0	0	0	0	0	0	1
Dry	Neap	1Q	D	E	7	3	0	0	0	0	0	0	0	3
Dry	Neap	1Q	D	E	8	1	0	1	0	0	0	0	0	2
Dry	Neap	1Q	D	E	9	3	1	0	0	0	0	0	0	4
Dry	Neap	1Q	N	F	1	0	0	0	0	0	0	0	0	0
Dry	Neap	1Q	N	F	2	0	4	0	0	0	0	0	0	4
Dry	Neap	1Q	N	F	3	0	0	0	0	1	0	0	2	3
Dry	Neap	1Q	N	F	4	0	0	0	0	0	0	0	0	0
Dry	Neap	1Q	N	F	5	1	2	1	0	0	0	0	0	4
Dry	Neap	1Q	N	F	6	0	0	0	0	0	0	0	0	0
Dry	Neap	1Q	N	F	7	0	1	0	0	0	0	0	0	1
Dry	Neap	1Q	N	F	8	1	0	0	0	0	0	0	2	3
Dry	Neap	1Q	N	F	9	0	2	0	0	0	0	0	0	2
Dry	Neap	1Q	N	E	1	0	0	0	0	0	0	0	0	0
Dry	Neap	1Q	N	E	2	1	1	0	0	0	0	0	0	2
Dry	Neap	1Q	N	E	3	0	0	0	0	0	0	0	0	0
Dry	Neap	1Q	N	E	4	1	0	0	0	0	0	0	0	1
Dry	Neap	1Q	N	E	5	0	3	0	0	0	0	0	0	3
Dry	Neap	1Q	N	E	6	0	1	0	0	0	0	0	0	1
Dry	Neap	1Q	N	E	7	0	1	0	0	0	0	0	0	1
Dry	Neap	1Q	N	E	8	0	0	0	0	0	0	0	0	0
Dry	Neap	1Q	N	E	9	0	0	0	0	0	0	0	0	0
Dry	Spring	FM	D	F	1	0	1	3	0	0	0	0	0	4
Dry	Spring	FM	D	F	2	3	0	1	0	0	0	0	0	4
Dry	Spring	FM	D	F	3	5	0	2	0	0	0	0	0	7
Dry	Spring	FM	D	F	4	3	0	1	0	1	0	0	0	5
Dry	Spring	FM	D	F	5	4	0	1	0	0	0	0	0	5
Dry	Spring	FM	D	F	6	2	0	1	0	0	0	0	0	3
Dry	Spring	FM	D	F	7	5	0	0	0	0	0	0	0	5
Dry	Spring	FM	D	F	8	4	0	2	0	0	0	0	0	6
Dry	Spring	FM	D	F	9	2	1	2	0	0	0	0	0	5
Dry	Spring	FM	D	F	10	0	1	1	0	0	1	0	0	3
Dry	Spring	FM	D	F	11	7	1	1	0	0	0	0	0	9
Dry	Spring	FM	D	F	12	0	0	2	0	0	1	0	0	3
Dry	Spring	FM	D	F	13	5	0	0	0	0	0	0	0	5
Dry	Spring	FM	D	F	14	12	2	1	0	0	0	0	0	15
Dry	Spring	FM	D	F	15	4	0	1	0	0	0	0	0	5
Dry	Spring	FM	D	F	16	7	0	1	0	0	0	0	0	8
Dry	Spring	FM	D	F	17	5	1	1	0	0	0	0	0	7
Dry	Spring	FM	D	F	18	4	0	0	0	0	0	0	0	4
Dry	Spring	FM	D	F	19	10	0	0	0	0	0	0	0	10
Dry	Spring	FM	D	F	20	6	1	0	0	0	0	0	0	7
Dry	Spring	FM	D	E	1	2	0	0	0	0	0	0	44	46
Dry	Spring	FM	D	E	2	2	0	1	0	0	0	1	0	4
Dry	Spring	FM	D	E	3	2	0	1	0	0	0	0	0	3
Dry	Spring	FM	D	E	4	2	0	0	0	0	0	0	0	2
Dry	Spring	FM	D	E	5	2	0	1	0	0	0	0	0	3
Dry	Spring	FM	D	E	6	0	0	0	0	0	0	0	0	0
Dry	Spring	FM	D	E	7	2	0	0	0	0	1	0	49	52
Dry	Spring	FM	D	E	8	0	0	1	0	0	0	0	0	1
Dry	Spring	FM	D	E	9	1	0	0	0	0	0	1	0	2
Dry	Spring	FM	D	E	10	0	0	0	0	0	0	0	0	0
Dry	Spring	FM	D	E	11	2	0	0	0	0	0	2	0	4
Dry	Spring	FM	D	E	12	0	0	2	0	0	0	0	0	2
Dry	Spring	FM	D	E	13	2	0	0	0	0	0	0	0	2
Dry	Spring	FM	D	E	14	0	0	0	0	0	0	1	1	2
Dry	Spring	FM	D	E	15	1	0	0	0	0	0	1	1	3
Dry	Spring	FM	D	E	16	0	0	0	0	0	0	0	49	49
Dry	Spring	FM	D	E	17	0	0	0	0	0	0	0	0	0
Dry	Spring	FM	D	E	18	0	0	0	0	0	0	2	1	3
Dry	Spring	FM	D	E	19	2	0	0	0	0	1	0	0	3
Dry	Spring	FM	D	E	20	1	0	0	0	0	0	1	0	2
Dry	Spring	FM	N	F	1	2	2	2	0	0	0	0	0	6
Dry	Spring	FM	N	F	2	3	0	1	1	0	2	0	0	7
Dry	Spring	FM	N	F	3	7	1	3	0	0	0	0	0	11
Dry	Spring	FM	N	F	4	4	1	1	0	0	0	0	0	6
Dry	Spring	FM	N	F	5	5	0	1	0	0	0	0	0	6
Dry	Spring	FM	N	F	6	4	0	2	0	0	0	0	0	6
Dry	Spring	FM	N	F	7	4	0	2	0	0	0	0	0	6
Dry	Spring	FM	N	F	8	5	0	0	0	0	0	0	0	5
Dry	Spring	FM	N	F	9	2	0	2	0	0	0	0	0	4
Dry	Spring	FM	N	F	10	5	1	3	0	0	0	0	0	9
Dry	Spring	FM	N	F	11	8	0	2	0	0	0	0	0	10
Dry	Spring	FM	N	F	12	6	0	2	0	0	0	0	1	9
Dry	Spring	FM	N	F	13	10	1	0	0	0	0	0	0	11
Dry	Spring	FM	N	F	14	9	0	1	0	0	0	0	0	10
Dry	Spring	FM	N	F	15	12	0	2	0	0	0	0	0	14
Dry	Spring	FM	N	F	16	6	0	2	0	0	0	0	0	8
Dry	Spring	FM	N	F	17	9	0	0	0	0	0	0	0	9
Dry	Spring	FM	N	F	18	14	0	1	0	0	0	0	0	15
Dry	Spring	FM	N	F	19	4	0	0	0	0	0	0	0	4
Dry	Spring	FM	N	E	1	6	1	0	0	0	0	0	0	7
Dry	Spring	FM	N	E	2	2	1	0	0	0	0	0	0	3
Dry	Spring	FM	N	E	3	3	0	0	0	0	0	0	0	3
Dry	Spring	FM	N	E	4	1	1	0	0	0	0	0	0	2
Dry	Spring	FM	N	E	5	2	0	1	0	0	0	0	0	3
Dry	Spring	FM	N	E	6	6	0	0	0	1	0	0	0	7
Dry	Spring	FM	N	E	7	1	0	0	0	0	0	0	0	1
Dry	Spring	FM	N	E	8	1	0	0	0	0	2	0	0	3
Dry	Spring	FM	N	E	9	1	0	0	0	0	0	0	0	1
Dry	Spring	FM	N	E	10	2	0	0	0	0	0	0	0	2
Dry	Spring	FM	N	E	11	1	0	0	0	0	3	0	0	4
Dry	Spring	FM	N	E	12	1	1	0	0	0	0	0	1	3
Dry	Spring	FM	N	E	13	2	0	0	0	0	0	0	0	2
Dry	Spring	FM	N	E	14	2	0	0	0	0	1	0	0	3
Dry	Spring	FM	N	E	15	3	0	0	0	0	1	0	0	4
Dry	Spring	FM	N	E	16	2	1	0	0	0	0	0	0	3
Dry	Spring	FM	N	E	17	2	0	0	0	0	0	0	1	3
Dry	Spring	FM	N	E	18	3	0	0	0	0	0	0	0	3
Dry	Spring	FM	N	E	19	5	1	1	0	0	0	0	1	8
Dry	Spring	FM	N	E	20	1	0	0	0	0	2	0	0	3
Dry	Neap	3Q	D	F	1	3	0	2	0	0	0	0	0	5
Dry	Neap	3Q	D	F	2	1	0	1	0	0	0	0	0	2
Dry	Neap	3Q	D	F	3	5	1	1	0	0	0	0	0	7
Dry	Neap	3Q	D	F	4	0	0	0	0	0	0	0	0	0
Dry	Neap	3Q	D	F	5	1	0	0	0	0	0	0	0	1
Dry	Neap	3Q	D	F	6	5	1	0	0	0	4	0	0	10
Dry	Neap	3Q	D	F	7	0	0	2	0	0	0	0	0	2
Dry	Neap	3Q	D	F	8	3	1	1	0	0	0	0	0	5
Dry	Neap	3Q	D	F	9	1	0	1	0	0	0	0	0	2
Dry	Neap	3Q	D	E	1	4	0	1	0	0	0	0	0	5
Dry	Neap	3Q	D	E	2	3	0	1	0	1	0	0	0	5
Dry	Neap	3Q	D	E	3	5	0	0	0	0	0	0	0	5
Dry	Neap	3Q	D	E	4	0	0	0	0	0	0	0	0	0
Dry	Neap	3Q	D	E	5	6	0	1	0	0	1	0	0	8
Dry	Neap	3Q	D	E	6	5	0	0	0	2	0	0	0	7
Dry	Neap	3Q	D	E	7	3	0	1	0	0	0	0	0	4
Dry	Neap	3Q	D	E	8	5	0	1	0	0	0	0	1	7
Dry	Neap	3Q	D	E	9	2	0	0	0	0	0	0	1	3
Dry	Neap	3Q	N	F	1	1	0	0	0	0	0	0	2	3
Dry	Neap	3Q	N	F	2	10	0	0	0	0	0	0	0	10
Dry	Neap	3Q	N	F	3	0	0	1	0	0	0	0	0	1
Dry	Neap	3Q	N	F	4	8	0	0	0	1	3	0	0	12
Dry	Neap	3Q	N	F	5	6	0	0	0	0	2	0	0	8
Dry	Neap	3Q	N	F	6	16	0	0	0	0	0	0	0	16
Dry	Neap	3Q	N	F	7	3	0	0	0	0	0	0	0	3
Dry	Neap	3Q	N	F	8	2	0	1	0	0	0	0	0	3
Dry	Neap	3Q	N	F	9	6	0	0	0	0	2	0	1	9
Dry	Neap	3Q	N	E	1	1	0	2	0	0	0	0	0	3
Dry	Neap	3Q	N	E	2	1	0	1	0	1	0	0	0	3
Dry	Neap	3Q	N	E	3	2	0	0	0	0	1	0	0	3
Dry	Neap	3Q	N	E	4	5	0	0	0	0	0	0	2	7
Dry	Neap	3Q	N	E	5	4	0	0	0	0	0	0	0	4
Dry	Neap	3Q	N	E	6	4	0	0	0	0	1	0	0	5
Dry	Neap	3Q	N	E	7	5	0	0	0	0	0	0	0	5
Dry	Neap	3Q	N	E	8	4	0	0	0	0	1	0	0	5
Dry	Neap	3Q	N	E	9	0	0	1	0	0	0	0	0	1
Dry	Spring	NM	D	F	1	1	0	1	1	0	0	0	0	3
Dry	Spring	NM	D	F	2	3	0	1	0	0	0	0	0	4
Dry	Spring	NM	D	F	3	2	0	0	0	0	1	0	0	3
Dry	Spring	NM	D	F	4	6	0	0	0	0	0	0	0	6
Dry	Spring	NM	D	F	5	3	0	1	0	0	0	0	0	4
Dry	Spring	NM	D	F	6	4	0	1	0	0	0	0	0	5
Dry	Spring	NM	D	F	7	3	0	1	0	0	0	0	0	4
Dry	Spring	NM	D	F	8	1	1	0	0	0	0	0	1	3
Dry	Spring	NM	D	F	9	4	0	0	0	0	0	0	0	4
Dry	Spring	NM	D	F	10	3	0	0	0	0	1	0	0	4
Dry	Spring	NM	D	F	11	5	0	0	0	0	0	0	0	5
Dry	Spring	NM	D	F	12	8	0	0	0	0	0	0	0	8
Dry	Spring	NM	D	F	13	8	0	0	0	0	0	0	0	8
Dry	Spring	NM	D	F	14	5	1	0	0	0	2	0	0	8
Dry	Spring	NM	D	F	15	6	0	0	0	0	0	0	0	6
Dry	Spring	NM	D	E	1	0	0	1	3	0	0	0	0	4
Dry	Spring	NM	D	E	2	1	0	1	0	1	0	0	1	4
Dry	Spring	NM	D	E	3	0	0	1	2	0	0	0	0	3
Dry	Spring	NM	D	E	4	1	0	0	0	0	0	0	0	1
Dry	Spring	NM	D	E	5	0	0	0	1	0	1	0	0	2
Dry	Spring	NM	D	E	6	1	0	1	0	0	1	0	1	4
Dry	Spring	NM	D	E	7	0	1	0	1	0	0	0	0	2
Dry	Spring	NM	D	E	8	1	0	0	0	0	1	0	70	72
Dry	Spring	NM	D	E	9	1	0	0	0	0	0	0	55	56
Dry	Spring	NM	D	E	10	0	0	0	0	0	1	0	0	1
Dry	Spring	NM	D	E	11	1	0	0	1	0	1	0	0	3
Dry	Spring	NM	D	E	12	0	0	0	1	0	2	0	0	3
Dry	Spring	NM	D	E	13	0	0	0	0	0	0	0	0	0
Dry	Spring	NM	D	E	14	0	0	0	0	0	1	0	0	1
Dry	Spring	NM	D	E	15	2	0	0	0	0	0	0	0	2
Dry	Spring	NM	D	E	16	1	0	0	0	0	0	0	0	1
Dry	Spring	NM	D	E	17	1	0	0	0	0	0	0	0	1
Dry	Spring	NM	N	F	1	3	0	2	1	0	0	0	0	6
Dry	Spring	NM	N	F	2	6	0	1	0	0	0	0	0	7
Dry	Spring	NM	N	F	3	4	1	0	0	1	0	0	0	6
Dry	Spring	NM	N	F	4	9	0	0	0	0	0	0	0	9
Dry	Spring	NM	N	F	5	4	0	1	0	0	0	0	0	5
Dry	Spring	NM	N	F	6	6	1	0	0	0	0	0	0	7
Dry	Spring	NM	N	F	7	3	0	1	0	0	1	0	0	5
Dry	Spring	NM	N	F	8	8	0	0	0	0	0	0	0	8
Dry	Spring	NM	N	F	9	13	0	0	0	0	2	0	0	15
Dry	Spring	NM	N	F	10	7	0	0	0	0	0	0	0	7
Dry	Spring	NM	N	F	11	3	0	1	0	0	0	0	0	4
Dry	Spring	NM	N	F	12	4	2	1	0	0	0	0	0	7
Dry	Spring	NM	N	F	13	5	0	0	0	0	0	0	0	5
Dry	Spring	NM	N	F	14	4	0	0	0	0	0	0	0	4
Dry	Spring	NM	N	F	15	10	1	0	0	0	0	0	0	11
Dry	Spring	NM	N	F	16	11	1	0	0	0	0	0	0	12
Dry	Spring	NM	N	F	17	3	0	0	0	0	0	0	0	3
Dry	Spring	NM	N	E	1	3	0	0	0	0	0	0	0	3
Dry	Spring	NM	N	E	2	3	0	0	0	0	0	1	1	5
Dry	Spring	NM	N	E	3	7	0	1	0	0	0	0	0	8
Dry	Spring	NM	N	E	4	2	0	1	0	0	0	0	0	3
Dry	Spring	NM	N	E	5	1	1	0	0	0	0	0	0	2
Dry	Spring	NM	N	E	6	3	0	1	0	0	0	0	0	4
Dry	Spring	NM	N	E	7	1	0	0	1	0	0	0	0	2
Dry	Spring	NM	N	E	8	1	0	0	0	0	0	0	0	1
Dry	Spring	NM	N	E	9	1	0	0	0	0	0	0	0	1
Dry	Spring	NM	N	E	10	1	0	0	0	0	0	0	0	1
Dry	Spring	NM	N	E	11	2	0	0	0	0	0	0	0	2
Dry	Spring	NM	N	E	12	6	0	0	0	0	0	0	0	6
Dry	Spring	NM	N	E	13	2	1	0	0	0	1	0	1	5
Dry	Spring	NM	N	E	14	3	0	0	0	0	1	0	0	4
Dry	Spring	NM	N	E	15	4	0	0	0	0	0	0	2	6
Dry	Spring	NM	N	E	16	5	1	0	0	0	0	0	0	6
Dry	Spring	NM	N	E	17	4	0	0	0	0	1	0	1	6
Wet	Neap	1Q	D	F	1	1	6	0	3	0	0	2	0	12
Wet	Neap	1Q	D	F	2	1	4	0	4	0	0	0	0	9
Wet	Neap	1Q	D	F	3	2	6	1	3	0	0	0	0	12
Wet	Neap	1Q	D	F	4	0	3	2	5	0	0	0	0	10
Wet	Neap	1Q	D	F	5	4	9	0	2	0	0	0	0	15
Wet	Neap	1Q	D	F	6	0	9	0	2	0	0	0	0	11
Wet	Neap	1Q	D	F	7	0	9	1	3	0	0	0	0	13
Wet	Neap	1Q	D	F	8	4	3	3	5	0	0	0	0	15
Wet	Neap	1Q	D	F	9	1	5	3	2	0	0	0	0	11
Wet	Neap	1Q	D	E	1	1	0	1	1	0	0	0	2	5
Wet	Neap	1Q	D	E	2	2	2	1	2	0	0	0	2	9
Wet	Neap	1Q	D	E	3	0	2	0	0	0	0	0	2	4
Wet	Neap	1Q	D	E	4	1	1	1	2	0	0	0	2	7
Wet	Neap	1Q	D	E	5	0	0	2	3	1	0	0	1	7
Wet	Neap	1Q	D	E	6	1	1	4	3	0	0	0	1	10
Wet	Neap	1Q	D	E	7	1	3	1	1	0	0	1	0	7
Wet	Neap	1Q	D	E	8	2	2	1	5	0	0	0	1	11
Wet	Neap	1Q	D	E	9	1	3	2	1	0	0	0	0	7
Wet	Neap	1Q	N	F	1	2	7	1	2	0	0	0	0	12
Wet	Neap	1Q	N	F	2	2	7	0	2	0	0	0	1	12
Wet	Neap	1Q	N	F	3	0	8	2	0	0	0	0	0	10
Wet	Neap	1Q	N	F	4	0	11	2	2	0	0	0	2	17
Wet	Neap	1Q	N	F	5	2	7	0	4	0	0	0	0	13
Wet	Neap	1Q	N	F	6	1	8	0	0	0	0	0	0	9
Wet	Neap	1Q	N	F	7	0	5	2	2	0	0	0	0	9
Wet	Neap	1Q	N	F	8	1	12	0	1	0	0	0	0	14
Wet	Neap	1Q	N	F	9	1	10	1	1	0	0	0	1	14
Wet	Neap	1Q	N	E	1	1	2	0	0	0	0	0	0	3
Wet	Neap	1Q	N	E	2	0	0	0	0	0	0	0	0	0
Wet	Neap	1Q	N	E	3	4	4	0	0	0	0	0	0	8
Wet	Neap	1Q	N	E	4	1	6	0	1	0	0	1	0	9
Wet	Neap	1Q	N	E	5	1	6	1	1	0	0	0	2	11
Wet	Neap	1Q	N	E	6	2	3	1	1	0	0	0	0	7
Wet	Neap	1Q	N	E	7	1	5	0	0	0	0	0	1	7
Wet	Neap	1Q	N	E	8	0	3	0	1	0	1	0	1	6
Wet	Neap	1Q	N	E	9	4	10	0	0	0	1	0	0	15
Wet	Spring	FM	D	F	1	1	4	0	0	0	0	0	0	5
Wet	Spring	FM	D	F	2	2	4	0	0	0	0	1	0	7
Wet	Spring	FM	D	F	3	1	7	0	0	0	0	0	1	9
Wet	Spring	FM	D	F	4	5	3	1	1	0	0	1	0	11
Wet	Spring	FM	D	F	5	1	3	2	0	0	0	0	0	6
Wet	Spring	FM	D	F	6	2	1	0	0	0	1	0	1	5
Wet	Spring	FM	D	F	7	3	3	1	0	0	1	0	0	8
Wet	Spring	FM	D	F	8	3	6	0	0	0	0	0	2	11
Wet	Spring	FM	D	F	9	0	4	3	0	0	0	0	0	7
Wet	Spring	FM	D	F	10	2	6	0	0	0	0	0	1	9
Wet	Spring	FM	D	F	11	5	7	1	0	0	1	1	2	17
Wet	Spring	FM	D	F	12	3	8	0	0	0	0	0	1	12
Wet	Spring	FM	D	F	13	1	3	0	2	0	0	0	0	6
Wet	Spring	FM	D	F	14	2	6	2	1	0	0	0	0	11
Wet	Spring	FM	D	F	15	0	6	3	0	0	0	0	0	9
Wet	Spring	FM	D	F	16	0	2	0	1	0	0	0	0	3
Wet	Spring	FM	D	E	1	0	10	0	1	0	0	0	1	12
Wet	Spring	FM	D	E	2	2	8	1	0	0	0	0	4	15
Wet	Spring	FM	D	E	3	2	10	0	1	0	0	0	2	15
Wet	Spring	FM	D	E	4	9	9	0	0	0	1	1	9	29
Wet	Spring	FM	D	E	5	5	5	0	0	1	0	2	6	19
Wet	Spring	FM	D	E	6	4	10	2	1	0	0	0	6	23
Wet	Spring	FM	D	E	7	1	8	1	0	0	0	0	4	14
Wet	Spring	FM	D	E	8	3	2	0	0	0	0	0	0	5
Wet	Spring	FM	D	E	9	4	9	1	0	0	1	1	10	26
Wet	Spring	FM	D	E	10	0	8	3	1	0	0	0	0	12
Wet	Spring	FM	D	E	11	1	14	0	2	0	0	1	0	18
Wet	Spring	FM	D	E	12	3	8	1	0	0	0	1	4	17
Wet	Spring	FM	D	E	13	3	8	1	1	0	0	1	2	16
Wet	Spring	FM	D	E	14	6	6	1	0	0	0	7	0	20
Wet	Spring	FM	D	E	15	13	6	0	0	0	1	0	0	20
Wet	Spring	FM	D	E	16	6	4	0	0	0	0	0	0	10
Wet	Spring	FM	D	E	17	3	4	0	1	0	0	2	0	10
Wet	Spring	FM	D	E	18	0	17	1	0	0	0	1	0	19
Wet	Spring	FM	N	F	1	0	5	1	0	0	0	0	0	6
Wet	Spring	FM	N	F	2	0	8	0	0	0	0	0	0	8
Wet	Spring	FM	N	F	3	4	5	0	1	0	0	0	0	10
Wet	Spring	FM	N	F	4	4	7	1	1	0	0	0	0	13
Wet	Spring	FM	N	F	5	2	4	0	0	0	0	0	0	6
Wet	Spring	FM	N	F	6	5	5	4	0	0	0	0	0	14
Wet	Spring	FM	N	F	7	3	9	0	0	0	0	0	0	12
Wet	Spring	FM	N	F	8	3	14	2	0	0	0	0	0	19
Wet	Spring	FM	N	E	1	1	3	0	0	0	0	0	0	4
Wet	Spring	FM	N	E	2	1	2	0	0	0	0	0	0	3
Wet	Spring	FM	N	E	3	2	2	0	0	0	0	1	1	6
Wet	Spring	FM	N	E	4	1	5	0	4	0	2	0	0	12
Wet	Spring	FM	N	E	5	1	4	0	0	0	0	0	0	5
Wet	Spring	FM	N	E	6	3	6	0	0	0	1	0	0	10
Wet	Spring	FM	N	E	7	3	3	0	0	0	0	3	0	9
Wet	Spring	FM	N	E	8	3	9	2	0	0	0	0	1	15
Wet	Spring	FM	N	E	9	1	5	0	0	0	0	0	0	6
Wet	Spring	FM	N	E	10	3	4	0	0	0	0	0	0	7
Wet	Spring	FM	N	E	11	0	11	1	0	0	0	0	0	12
Wet	Spring	FM	N	E	12	0	4	0	0	0	1	0	0	5
Wet	Spring	FM	N	E	13	3	3	0	0	0	0	0	1	7
Wet	Spring	FM	N	E	14	1	5	0	0	0	0	0	0	6
Wet	Spring	FM	N	E	15	4	3	0	1	0	1	0	0	9
Wet	Neap	3Q	D	F	1	0	5	1	1	0	0	0	1	8
Wet	Neap	3Q	D	F	2	0	7	2	0	0	0	0	1	10
Wet	Neap	3Q	D	F	3	1	11	1	3	0	0	0	0	16
Wet	Neap	3Q	D	F	4	0	10	0	2	0	0	0	1	13
Wet	Neap	3Q	D	F	5	1	7	0	2	0	0	0	0	10
Wet	Neap	3Q	D	F	6	2	23	1	1	0	0	0	2	29
Wet	Neap	3Q	D	F	7	0	5	2	8	0	0	0	0	15
Wet	Neap	3Q	D	F	8	0	9	2	1	0	0	0	0	12
Wet	Neap	3Q	D	F	9	2	12	0	1	0	0	0	0	15
Wet	Neap	3Q	D	E	1	3	4	0	1	0	0	0	0	8
Wet	Neap	3Q	D	E	2	0	8	0	2	0	0	0	0	10
Wet	Neap	3Q	D	E	3	2	3	0	0	0	0	0	1	6
Wet	Neap	3Q	D	E	4	0	3	0	2	0	0	0	2	7
Wet	Neap	3Q	D	E	5	1	0	0	2	0	0	0	0	3
Wet	Neap	3Q	D	E	6	1	6	1	2	0	0	0	0	10
Wet	Neap	3Q	D	E	7	0	3	0	2	0	0	0	1	6
Wet	Neap	3Q	D	E	8	2	1	0	0	0	1	0	0	4
Wet	Neap	3Q	D	E	9	1	6	0	0	0	1	0	1	9
Wet	Neap	3Q	N	F	1	0	6	1	0	0	0	0	2	9
Wet	Neap	3Q	N	F	2	2	7	0	0	0	0	0	0	9
Wet	Neap	3Q	N	F	3	0	6	2	0	0	0	0	0	8
Wet	Neap	3Q	N	F	4	0	9	2	1	0	0	0	1	13
Wet	Neap	3Q	N	F	5	0	7	0	2	0	0	0	2	11
Wet	Neap	3Q	N	F	6	1	8	0	1	0	0	0	0	10
Wet	Neap	3Q	N	F	7	0	6	1	1	0	0	0	0	8
Wet	Neap	3Q	N	F	8	1	13	0	1	0	0	0	0	15
Wet	Neap	3Q	N	F	9	0	8	0	0	0	0	0	1	9
Wet	Neap	3Q	N	E	1	0	3	0	0	0	0	0	0	3
Wet	Neap	3Q	N	E	2	0	3	0	0	0	0	0	0	3
Wet	Neap	3Q	N	E	3	1	3	0	0	0	0	0	0	4
Wet	Neap	3Q	N	E	4	0	8	0	1	1	0	0	0	10
Wet	Neap	3Q	N	E	5	0	7	1	0	0	0	0	1	9
Wet	Neap	3Q	N	E	6	0	5	0	0	1	0	0	0	6
Wet	Neap	3Q	N	E	7	1	2	0	1	0	0	0	0	4
Wet	Neap	3Q	N	E	8	0	6	0	0	0	0	0	0	6
Wet	Neap	3Q	N	E	9	1	5	0	0	0	0	0	0	6
Wet	Spring	NM	D	F	1	0	5	0	0	1	0	0	0	6
Wet	Spring	NM	D	F	2	4	7	0	0	0	0	0	0	11
Wet	Spring	NM	D	F	3	0	3	0	0	0	0	0	0	3
Wet	Spring	NM	D	F	4	1	11	0	2	0	0	1	1	16
Wet	Spring	NM	D	F	5	5	24	1	0	0	0	0	0	30
Wet	Spring	NM	D	F	6	2	10	0	0	0	0	0	0	12
Wet	Spring	NM	D	F	7	1	19	0	0	0	0	0	1	21
Wet	Spring	NM	D	F	8	6	9	1	0	0	0	0	0	16
Wet	Spring	NM	D	F	9	3	9	0	1	0	0	0	0	13
Wet	Spring	NM	D	F	10	4	15	0	0	0	0	0	0	19
Wet	Spring	NM	D	F	11	10	11	0	0	0	1	0	0	22
Wet	Spring	NM	D	F	12	2	18	0	0	0	0	0	0	20
Wet	Spring	NM	D	F	13	11	9	0	0	0	0	0	0	20
Wet	Spring	NM	D	F	14	1	24	0	2	0	0	0	0	27
Wet	Spring	NM	D	E	1	8	15	0	1	0	0	1	1	26
Wet	Spring	NM	D	E	2	5	16	0	2	0	1	0	3	27
Wet	Spring	NM	D	E	3	8	10	0	1	0	0	0	3	22
Wet	Spring	NM	D	E	4	12	16	0	1	0	0	0	1	30
Wet	Spring	NM	D	E	5	19	11	1	0	1	0	0	2	34
Wet	Spring	NM	D	E	6	13	11	0	1	0	0	0	2	27
Wet	Spring	NM	D	E	7	11	23	0	1	1	1	0	0	37
Wet	Spring	NM	D	E	8	8	17	0	1	1	0	0	2	29
Wet	Spring	NM	D	E	9	14	20	0	1	1	1	0	1	38
Wet	Spring	NM	D	E	10	6	19	0	0	0	0	1	1	27
Wet	Spring	NM	D	E	11	16	17	0	3	0	0	0	1	37
Wet	Spring	NM	D	E	12	12	23	1	1	0	0	0	0	37
Wet	Spring	NM	D	E	13	19	15	0	1	0	0	0	3	38
Wet	Spring	NM	D	E	14	9	14	0	0	0	0	0	1	24
Wet	Spring	NM	D	E	15	12	12	1	1	0	0	0	1	27
Wet	Spring	NM	D	E	16	10	14	0	0	0	0	0	0	24
Wet	Spring	NM	D	E	17	10	5	0	1	0	0	0	0	16
Wet	Spring	NM	N	F	1	5	14	0	1	0	0	0	0	20
Wet	Spring	NM	N	F	2	4	23	0	1	0	0	0	0	28
Wet	Spring	NM	N	F	3	4	17	1	2	0	0	0	0	24
Wet	Spring	NM	N	F	4	8	16	0	2	0	0	0	0	26
Wet	Spring	NM	N	F	5	5	13	0	3	0	0	0	0	21
Wet	Spring	NM	N	F	6	8	15	0	1	0	0	1	0	25
Wet	Spring	NM	N	F	7	6	19	1	2	1	0	0	0	29
Wet	Spring	NM	N	E	1	0	2	0	0	0	0	0	1	3
Wet	Spring	NM	N	E	2	1	10	0	3	0	0	0	0	14
Wet	Spring	NM	N	E	3	0	2	0	1	0	0	0	0	3
Wet	Spring	NM	N	E	4	2	7	0	1	0	0	0	2	12
Wet	Spring	NM	N	E	5	1	8	0	1	0	0	0	0	10
Wet	Spring	NM	N	E	6	2	7	0	0	0	0	2	2	13
Wet	Spring	NM	N	E	7	0	9	0	0	0	0	1	2	12
Wet	Spring	NM	N	E	8	3	7	0	1	0	0	0	3	14
Wet	Spring	NM	N	E	9	2	4	0	0	0	0	0	1	7
Wet	Spring	NM	N	E	10	7	8	0	3	0	0	0	0	18
Wet	Spring	NM	N	E	11	4	8	0	2	0	0	0	1	15
Wet	Spring	NM	N	E	12	3	16	0	0	0	0	1	2	22
Wet	Spring	NM	N	E	13	3	15	0	2	0	0	0	3	23
Wet	Spring	NM	N	E	14	3	6	0	0	0	0	0	1	10
Wet	Spring	NM	N	E	15	1	3	0	3	0	0	0	0	7
Wet	Spring	NM	N	E	16	9	11	0	3	0	0	0	0	23
Wet	Spring	NM	N	E	17	6	10	0	1	0	0	0	1	18
Wet	Spring	NM	N	E	18	0	7	0	1	0	0	0	0	8

## Sheet: 24 HR WATER PARAMETER
Temporal Variables						Water Parameters
Period	Moon-Tide	Moon Phase	Diel	Tide	Replicate	Temperature (°C)	Salinity (ppt)	pH	Turbidity (NTU)	DO (mg/L)	Water Current (m/s)
Dry	Neap	1Q	D	E	1	29.83	31.42	7.71	22.7	5.45	0.426
Dry	Neap	1Q	D	E	2	30.13	31.07	7.9	55.5	5.05	0.515
Dry	Neap	1Q	D	E	3	29.74	31.39	7.66	153.2	5.3	0.405
Dry	Neap	1Q	D	E	4	29.9	31.42	7.87	28	4.51	0.515
Dry	Neap	1Q	D	F	1	29.96	31.17	7.68	35.3	5.44	0.253
Dry	Neap	1Q	D	F	2	30.1	31.5	7.83	25.8	5.95	0.083
Dry	Neap	1Q	D	F	3	29.65	31.41	7.66	59.2	5	0.227
Dry	Neap	1Q	D	F	4	29.96	31.51	7.8	25.7	4.95	0.169
Dry	Neap	1Q	N	E	1	29.83	31.51	7.93	45.7	6.5	0.258
Dry	Neap	1Q	N	E	2	29.77	31.39	7.98	22.9	5.73	0.381
Dry	Neap	1Q	N	E	3	29.96	31.07	7.85	34.1	5.45	0.387
Dry	Neap	1Q	N	E	4	29.74	31.51	7.85	57.3	5.97	0.259
Dry	Neap	1Q	N	E	5	29.75	31.42	7.91	114.4	5.98	0.298
Dry	Neap	1Q	N	E	6	29.77	31.39	7.84	38.2	5.23	0.381
Dry	Neap	1Q	N	F	1	29.77	31.52	7.83	35.4	5.65	0.232
Dry	Neap	1Q	N	F	2	29.83	31.39	7.78	34.7	5.4	0.368
Dry	Neap	1Q	N	F	3	29.77	31.38	7.89	34.4	5.42	0.294
Dry	Neap	1Q	N	F	4	29.77	31.49	7.87	59.1	5.85	0.291
Dry	Neap	1Q	N	F	5	29.79	31.43	7.8	50.1	5.35	0.328
Dry	Neap	1Q	N	F	6	29.74	31.45	7.8	42.1	4.98	0.269
Dry	Neap	3Q	D	E	1	29.75	31.42	7.67	31.8	5.47	0.245
Dry	Neap	3Q	D	E	2	30.47	31.39	7.93	22.5	6.52	0.368
Dry	Neap	3Q	D	E	3	30.54	31.37	7.9	20.9	6.11	0.455
Dry	Neap	3Q	D	E	4	29.74	31.39	7.66	43.4	5.48	0.227
Dry	Neap	3Q	D	E	5	29.75	31.39	7.87	26.8	5.78	0.36
Dry	Neap	3Q	D	E	6	29.99	31.42	7.77	67	5.55	0.42
Dry	Neap	3Q	D	F	1	29.79	31.41	7.75	24.2	5.43	0.3
Dry	Neap	3Q	D	F	2	30.23	31.5	7.83	26	6.7	0.21
Dry	Neap	3Q	D	F	3	29.65	31.41	7.66	46.8	5.3	0.27
Dry	Neap	3Q	D	F	4	29.83	31.51	7.78	75.9	5.62	0.234
Dry	Neap	3Q	N	E	1	29.71	31.51	7.84	45.3	6.26	0.378
Dry	Neap	3Q	N	E	2	29.81	31.42	7.97	27.2	5.56	0.381
Dry	Neap	3Q	N	E	3	29.98	31.46	7.85	45.7	4.91	0.387
Dry	Neap	3Q	N	E	4	29.74	31.49	7.85	50.9	5.43	0.35
Dry	Neap	3Q	N	E	5	29.77	31.44	7.93	30	5.28	0.298
Dry	Neap	3Q	N	E	6	29.96	31.42	7.81	70.5	4.64	0.381
Dry	Neap	3Q	N	F	1	29.74	31.52	7.95	46.3	5.17	0.29
Dry	Neap	3Q	N	F	2	29.62	31.4	7.78	29.4	5.59	0.368
Dry	Neap	3Q	N	F	3	29.82	31.4	7.84	24.7	5.13	0.294
Dry	Neap	3Q	N	F	4	29.77	31.5	7.85	48.7	5.08	0.267
Dry	Neap	3Q	N	F	5	29.61	31.47	7.79	59.3	4.57	0.328
Dry	Neap	3Q	N	F	6	29.58	31.46	7.82	38.4	4.47	0.269
Dry	Spring	FM	D	E	1	28.99	30.46	7.58	84.1	4.56	0.568
Dry	Spring	FM	D	E	2	30.07	28.99	7.61	293.3	4.34	0.442
Dry	Spring	FM	D	E	3	28.83	31.4	7.86	36.2	6.14	0.514
Dry	Spring	FM	D	E	4	29.03	30.83	7.66	221.6	4.65	0.481
Dry	Spring	FM	D	E	5	30.21	30.95	7.65	886.7	3.84	0.303
Dry	Spring	FM	D	E	6	28.85	31.38	7.86	52.9	5.2	0.46
Dry	Spring	FM	D	F	1	30.42	30.63	7.68	142.6	5.17	0.237
Dry	Spring	FM	D	F	2	30.04	30.7	7.71	117	5.08	0.62
Dry	Spring	FM	D	F	3	28.96	31.04	7.87	37.6	5.36	0.39
Dry	Spring	FM	D	F	4	30.1	31	7.65	123.6	4.34	0.309
Dry	Spring	FM	D	F	5	29.53	31.08	7.71	261.5	4.78	0.55
Dry	Spring	FM	D	F	6	28.91	31.21	7.85	75.4	5.22	0.31
Dry	Spring	FM	N	E	1	29.18	31.35	7.98	25.5	5.78	0.401
Dry	Spring	FM	N	E	2	29.19	30.92	8.09	31	5.5	0.322
Dry	Spring	FM	N	E	3	29.65	31.13	7.87	175.6	5.15	0.575
Dry	Spring	FM	N	E	4	29.22	31.34	7.96	55.2	5.64	0.4
Dry	Spring	FM	N	E	5	29.21	30.96	7.94	103.3	5.42	0.309
Dry	Spring	FM	N	E	6	29.61	31.08	7.82	504.3	4.92	0.514
Dry	Spring	FM	N	F	1	29.21	31.09	7.83	38.6	6.4	0.514
Dry	Spring	FM	N	F	2	29.56	30.71	7.73	103.2	5.43	0.46
Dry	Spring	FM	N	F	3	28.83	30.92	7.71	117	5.08	0.237
Dry	Spring	FM	N	F	4	29.59	30.74	7.73	374.5	4.44	0.31
Dry	Spring	FM	N	F	5	28.85	30.96	7.71	261.5	4.78	0.18
Dry	Spring	NM	D	E	1	28.78	30.31	7.91	44.8	5.08	0.393
Dry	Spring	NM	D	E	2	29.19	30.38	7.66	301.1	4.24	0.622
Dry	Spring	NM	D	E	3	28.98	31.36	7.96	61.3	7.02	0.385
Dry	Spring	NM	D	E	4	28.98	30.59	7.86	207.2	4.64	0.343
Dry	Spring	NM	D	E	5	29.09	30.41	7.72	1000	4.15	0.547
Dry	Spring	NM	D	E	6	29	31.34	7.98	64.5	5.87	0.41
Dry	Spring	NM	D	F	1	29.61	31.05	7.77	62.2	5.96	0.252
Dry	Spring	NM	D	F	2	30.61	29.77	7.79	77.7	6.5	0.378
Dry	Spring	NM	D	F	3	29	31.26	7.99	80.3	6.7	0.611
Dry	Spring	NM	D	F	4	29.46	31.05	7.76	126.4	4.76	0.233
Dry	Spring	NM	D	F	5	29.53	30.97	7.72	902.8	4.89	0.374
Dry	Spring	NM	D	F	6	29.04	31.23	8.01	176.8	5.81	0.561
Dry	Spring	NM	N	E	1	29.38	31.22	8.01	36.3	6.74	0.216
Dry	Spring	NM	N	E	2	30.49	30.57	7.91	54.5	6.61	0.667
Dry	Spring	NM	N	E	3	29.8	30.89	7.85	427.3	6.14	0.695
Dry	Spring	NM	N	E	4	29.4	31.2	8.07	41.4	5.96	0.393
Dry	Spring	NM	N	E	5	30.42	30.56	7.9	55.6	5.32	0.667
Dry	Spring	NM	N	E	6	29.81	30.89	7.87	812.4	5.15	0.593
Dry	Spring	NM	N	F	1	29.38	31.16	8.06	102.1	5.28	0.054
Dry	Spring	NM	N	F	2	29.55	30.6	7.79	319.6	6.65	0.351
Dry	Spring	NM	N	F	3	29.61	30.9	7.83	39.6	6.54	0.399
Dry	Spring	NM	N	F	4	29.41	31.14	8.04	72.7	5.71	0.494
Dry	Spring	NM	N	F	5	29.61	30.62	7.84	761.3	4.95	0.3
Dry	Spring	NM	N	F	6	29.47	30.97	7.87	217.9	5.11	0.313
Wet	Neap	1Q	D	E	1	29.79	28.79	7.76	14.9	4.28	0.032
Wet	Neap	1Q	D	E	2	29.9	28.64	7.68	8.3	4.17	0.26
Wet	Neap	1Q	D	E	3	30.2	29.22	7.75	54	3.94	0.643
Wet	Neap	1Q	D	E	4	29.84	28.8	7.73	10.4	3.83	0.119
Wet	Neap	1Q	D	E	5	29.93	28.96	7.65	92.1	3.56	0.321
Wet	Neap	1Q	D	E	6	30.12	29.28	7.75	324.3	3.69	0.524
Wet	Neap	1Q	D	F	1	29.62	28.46	7.72	2.5	4	0.311
Wet	Neap	1Q	D	F	2	30.16	28.91	7.84	9.9	4.57	0.392
Wet	Neap	1Q	D	F	3	29.89	28.94	7.72	21	3.75	0.255
Wet	Neap	1Q	D	F	4	30.09	29.1	7.82	301.2	3.76	0.273
Wet	Neap	1Q	N	E	1	29.76	28.62	7.88	20.7	4.44	0.161
Wet	Neap	1Q	N	E	2	29.72	27.02	7.79	11.3	4.17	0.203
Wet	Neap	1Q	N	E	3	29.76	28.59	7.86	22.6	4.01	0.075
Wet	Neap	1Q	N	E	4	29.88	28.77	7.88	38.6	3.94	0.215
Wet	Neap	1Q	N	F	1	29.09	26.13	7.88	13.9	4.14	0.079
Wet	Neap	1Q	N	F	2	29.62	28.64	7.84	6.4	4.57	0.206
Wet	Neap	1Q	N	F	3	29.13	28.62	7.9	7	4.26	0.203
Wet	Neap	1Q	N	F	4	29.89	28.82	7.94	16	4.02	0.188
Wet	Neap	1Q	N	F	5	29.89	28.85	7.86	55.5	3.94	0.215
Wet	Neap	1Q	N	F	6	29.88	28.65	7.88	58.8	3.83	0.225
Wet	Neap	3Q	D	E	1	29.6	29.33	7.79	139.7	4.04	0.622
Wet	Neap	3Q	D	E	2	30.55	29.14	7.64	14.2	5.06	0.46
Wet	Neap	3Q	D	E	3	30.02	29.84	7.58	184.4	4.63	0.548
Wet	Neap	3Q	D	E	4	29.58	29.46	7.72	30.9	3.82	0.462
Wet	Neap	3Q	D	E	5	29.79	29.44	7.55	150.5	3.67	0.428
Wet	Neap	3Q	D	E	6	29.94	29.85	7.7	225	3.96	0.497
Wet	Neap	3Q	D	F	1	29.6	29.42	7.78	8.8	3.63	0.483
Wet	Neap	3Q	D	F	2	30.08	29.62	7.72	5.6	4.7	0.267
Wet	Neap	3Q	D	F	3	29.71	29.56	7.77	55.5	3.47	0.35
Wet	Neap	3Q	D	F	4	29.87	29.75	7.75	471.5	3.99	0.397
Wet	Neap	3Q	N	E	1	29.99	28.55	7.97	7.8	4.13	0.196
Wet	Neap	3Q	N	E	2	30.2	29.24	8.01	12.6	4.02	0.148
Wet	Neap	3Q	N	E	3	30	29.11	7.99	3.8	4.28	0.385
Wet	Neap	3Q	N	E	4	30.06	29.62	7.99	39.5	3.87	0.255
Wet	Neap	3Q	N	E	5	30.05	29.62	8.02	18.4	3.78	0.219
Wet	Neap	3Q	N	E	6	30.1	29.63	7.99	23	3.79	0.306
Wet	Neap	3Q	N	F	1	29.62	26.89	7.9	6.2	4.62	0.394
Wet	Neap	3Q	N	F	2	29.81	29.2	7.92	3.2	4.35	0.439
Wet	Neap	3Q	N	F	3	30.02	29.64	8	60.4	3.88	0.406
Wet	Neap	3Q	N	F	4	30.1	29.71	7.95	36.7	3.7	0.233
Wet	Spring	FM	D	E	1	30.2	28.45	7.93	42.2	3.94	0.683
Wet	Spring	FM	D	E	2	29.88	29.35	7.72	238.4	4.23	0.665
Wet	Spring	FM	D	E	3	29.55	29.1	7.97	301.5	3.83	0.618
Wet	Spring	FM	D	E	4	29.82	29.35	7.74	429.2	4.02	0.63
Wet	Spring	FM	D	E	5	30.04	29.3	7.43	42.7	4.11	0.234
Wet	Spring	FM	D	F	1	30.32	28.61	7.69	130.4	4.52	0.582
Wet	Spring	FM	D	F	2	30.79	29.16	7.83	56.9	5.48	0.274
Wet	Spring	FM	D	F	3	30.03	29.11	7.29	37.9	4.74	0.501
Wet	Spring	FM	D	F	4	29.91	28.93	7.65	898.5	3.7	0.678
Wet	Spring	FM	D	F	5	30.23	29.01	7.63	1000	4.26	0.358
Wet	Spring	FM	D	F	6	30.06	29.34	7.35	62.7	4.08	0.418
Wet	Spring	FM	N	E	1	30.09	28.86	7.57	19.7	4.58	0.321
Wet	Spring	FM	N	E	2	30.25	29.08	7.68	126.9	4.9	0.563
Wet	Spring	FM	N	E	3	29.73	29.25	7.75	39.9	4.15	0.174
Wet	Spring	FM	N	E	4	30	29.36	7.57	236.7	3.91	0.396
Wet	Spring	FM	N	E	5	30.15	29.16	7.64	210	4.21	0.508
Wet	Spring	FM	N	E	6	29.78	29.5	7.73	146.9	3.86	0.206
Wet	Spring	FM	N	F	1	30.2	29.19	7.67	60.7	4.59	0.412
Wet	Spring	FM	N	F	2	30.36	29.04	7.69	45	4.68	0.307
Wet	Spring	FM	N	F	3	29.72	29.19	7.72	33.9	4.25	0.572
Wet	Spring	FM	N	F	4	30.32	29.03	7.68	81.9	4.14	0.175
Wet	Spring	FM	N	F	5	29.79	29.33	7.7	166.7	3.99	0.46
Wet	Spring	NM	D	E	1	29.75	27.97	7.9	5.5	4.87	0.65
Wet	Spring	NM	D	E	2	29.94	28.45	7.78	337	3.82	0.708
Wet	Spring	NM	D	E	3	29.88	28.46	7.9	354.1	4.8	0.642
Wet	Spring	NM	D	E	4	29.92	28.44	7.74	979	3.63	0.66
Wet	Spring	NM	D	F	1	29.85	27.54	7.58	71.8	3.57	0.353
Wet	Spring	NM	D	F	2	30.52	28.32	7.97	14.8	5.1	0.051
Wet	Spring	NM	D	F	3	30.2	28.3	8.13	10.5	5.77	0.744
Wet	Spring	NM	D	F	4	29.76	27.82	7.56	701	3.73	0.265
Wet	Spring	NM	D	F	5	30.18	28.39	7.81	457.4	3.73	0.157
Wet	Spring	NM	D	F	6	30.22	28.81	8.08	64.7	4.94	0.54
Wet	Spring	NM	N	E	1	29.98	27.55	7.85	10.3	4.23	0.521
Wet	Spring	NM	N	E	2	30.15	28.42	7.78	71.8	4.5	0.605
Wet	Spring	NM	N	E	3	30.11	27.82	7.88	554.1	3.8	0.427
Wet	Spring	NM	N	E	4	30.18	28.5	7.84	317	4.23	0.605
Wet	Spring	NM	N	F	1	30.09	28.25	7.82	18.3	4.5	0.088
Wet	Spring	NM	N	F	2	30.4	28.68	7.89	2.8	4.31	0.577
Wet	Spring	NM	N	F	3	29.75	28.58	7.8	5.3	3.94	0.011
Wet	Spring	NM	N	F	4	30.4	28.32	7.87	326	4.03	0.619
Wet	Spring	NM	N	F	5	29.78	28.68	7.76	457.4	3.94	0.136

## Sheet: 24 HR MEAN WATER PARAMETER
Temporal Variables					Mean Water Parameter
Period	Moon-Tide	Moon Phase	Diel	Tide	Temperature (°C)	Salinity	pH	Turbidity (NTU)	DO (mg/L)	Water Current (m/s)
Dry	Neap	1Q	D	F	29.94	31.3975	7.7425	36.5	5.335	0.183
Dry	Neap	1Q	D	E	29.9633	31.325	7.785	64.85	5.0775	0.46525
Dry	Neap	1Q	N	F	29.5833	31.4433	7.82833	42.6333	5.44167	0.297
Dry	Neap	1Q	N	E	29.78	31.3817	7.89333	52.1	5.81	0.327333
Dry	Spring	FM	D	F	30.2233	30.9433	7.745	126.283	4.99167	0.402667
Dry	Spring	FM	D	E	29.898	30.6683	7.70333	262.467	4.78833	0.461333
Dry	Spring	FM	N	F	30.078	30.884	7.742	178.96	5.226	0.3402
Dry	Spring	FM	N	E	30	31.13	7.94333	149.15	5.40167	0.420167
Dry	Neap	3Q	D	F	29.815	31.4575	7.755	43.225	5.7625	0.2535
Dry	Neap	3Q	D	E	29.9133	31.3967	7.8	35.4	5.81833	0.345833
Dry	Neap	3Q	N	F	29.8875	31.4583	7.83833	41.1333	5.00167	0.302667
Dry	Neap	3Q	N	E	30.0667	31.4567	7.875	44.9333	5.34667	0.3625
Dry	Spring	NM	D	F	30.1217	30.8883	7.84	237.7	5.77	0.4015
Dry	Spring	NM	D	E	29.8725	30.7317	7.84833	279.817	5.16667	0.45
Dry	Spring	NM	N	F	30.084	30.8983	7.905	252.2	5.70667	0.3185
Dry	Spring	NM	N	E	30.105	30.8883	7.935	237.917	5.98667	0.5385
Wet	Neap	1Q	D	F	29.9175	28.8525	7.775	83.65	4.02	0.30775
Wet	Neap	1Q	D	E	29.9	28.9483	7.72	84	3.91167	0.3165
Wet	Neap	1Q	N	F	29.7783	28.285	7.88333	26.2667	4.12667	0.186
Wet	Neap	1Q	N	E	29.8033	28.25	7.8525	23.3	4.14	0.1635
Wet	Spring	FM	D	F	29.66	29.0267	7.57333	364.4	4.46333	0.4685
Wet	Spring	FM	D	E	29.33	29.11	7.758	210.8	4.026	0.566
Wet	Spring	FM	N	F	29.208	29.156	7.692	77.64	4.33	0.3852
Wet	Spring	FM	N	E	29.3433	29.2017	7.65667	130.017	4.26833	0.361333
Wet	Neap	3Q	D	F	29.875	29.5875	7.755	135.35	3.9475	0.37425
Wet	Neap	3Q	D	E	30.04	29.51	7.66333	124.117	4.19667	0.502833
Wet	Neap	3Q	N	F	29.69	28.86	7.9425	26.625	4.1375	0.368
Wet	Neap	3Q	N	E	29.8283	29.295	7.995	17.5167	3.97833	0.2515
Wet	Spring	NM	D	F	29.5417	28.1967	7.855	220.033	4.47333	0.351667
Wet	Spring	NM	D	E	29.0033	28.33	7.83	418.9	4.28	0.665
Wet	Spring	NM	N	F	29.505	28.502	7.828	161.96	4.144	0.2862
Wet	Spring	NM	N	E	29.8833	28.0725	7.8375	238.3	4.19	0.5395
